# Supplementary material for: Genetic and immune features of resectable malignant brainstem gliomas
Source: PubMed Central journal article supplement (PMC5669911; doi:10.18632/oncotarget.19653), 2017-07-28
Supplement: oncotarget-08-82571-s001.pdf [file oncotarget-08-82571-s001.pdf]

# Genetic and immune features of resectable malignant brainstem gliomas

## SUPPLEMENTARY MATERIALS

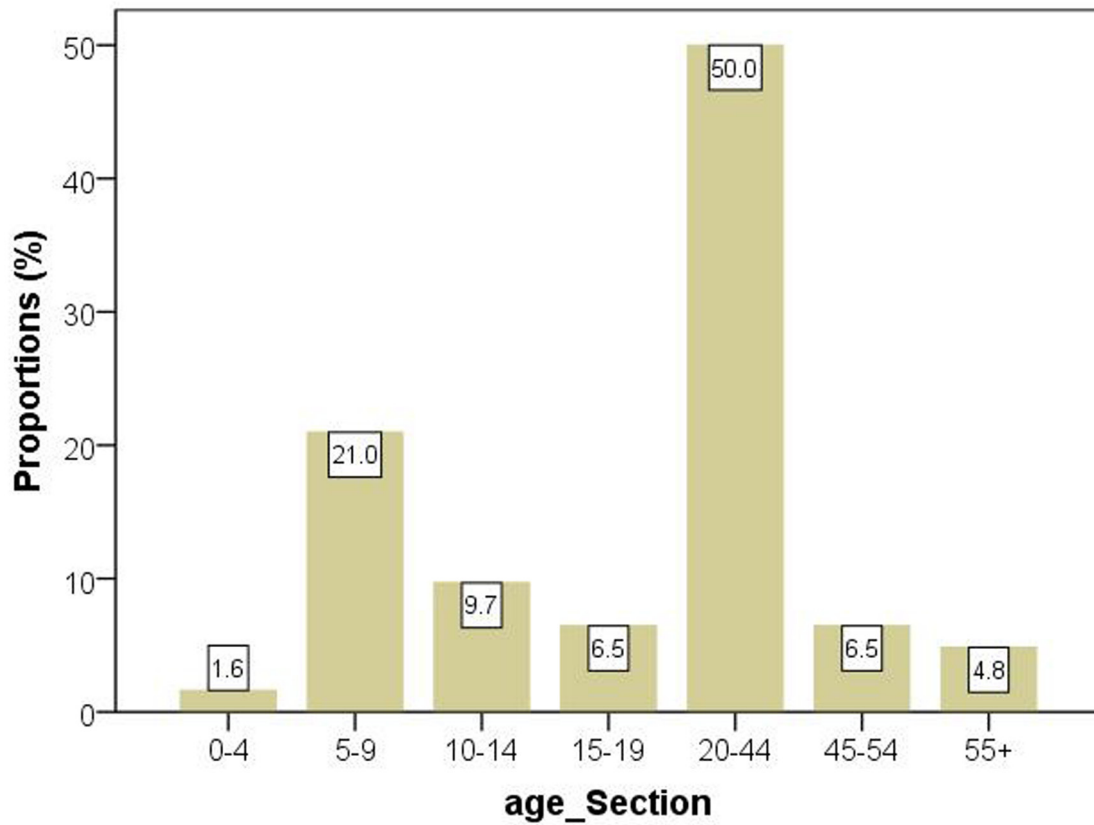

Supplementary Figure 1: Shows the age distribution of the included patients.

The correlation between the transcriptional and protein levels of PD-L1 in the study

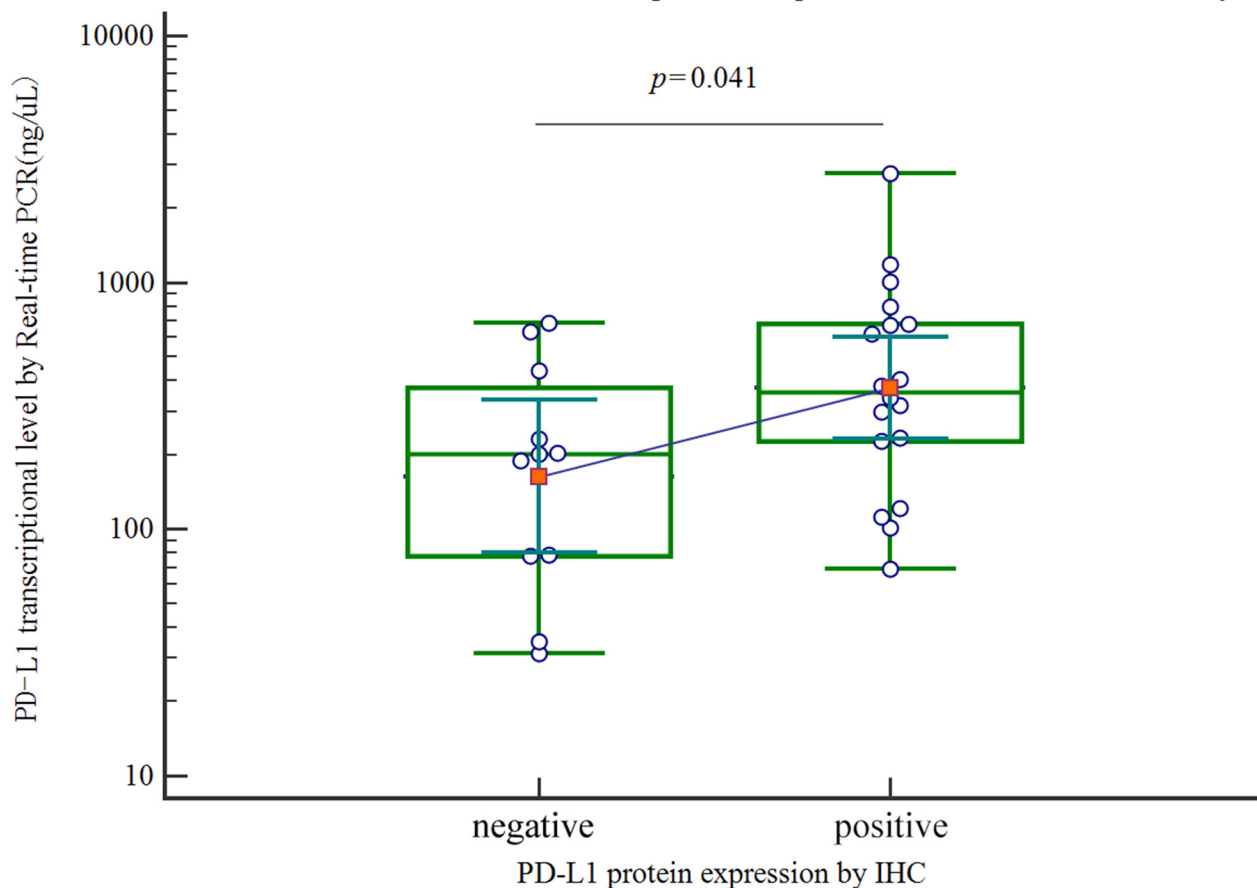

Supplementary Figure 2: Shows that transcriptional level of PD-L1 was significantly higher in the positive PD-L1 staining group than the negative PD-L1 staining, which was detected by the IHC method.

Supplementary Table 1: Distribution of genetic features of resectable brainstem gliomas in patients at different ages

| Genetic features |     | Children and adolescents (0-19 years) |     |       |       | Adults (≥ 20 years) |       |     |
|------------------|-----|---------------------------------------|-----|-------|-------|---------------------|-------|-----|
|                  |     | 0-4                                   | 5-9 | 10-14 | 15-19 | 20-44               | 45-54 | 55+ |
| IDH1/2           | MUT | 0                                     | 0   | 0     | 0     | 7                   | 2     | 0   |
|                  | WT  | 1                                     | 13  | 6     | 4     | 24                  | 2     | 3   |
| H3.3             | MUT | 0                                     | 10  | 5     | 4     | 16                  | 1     | 1   |
|                  | WT  | 1                                     | 3   | 1     | 0     | 15                  | 3     | 2   |
| PPM1D            | MUT | 0                                     | 3   | 1     | 1     | 7                   | 1     | 0   |
|                  | WT  | 1                                     | 10  | 5     | 3     | 24                  | 3     | 3   |
| TP53             | MUT | 0                                     | 6   | 4     | 3     | 13                  | 2     | 0   |
|                  | WT  | 1                                     | 7   | 2     | 1     | 18                  | 2     | 3   |
| MGMT             | M   | 0                                     | 0   | 0     | 0     | 5                   | 1     | 1   |
|                  | UM  | 1                                     | 13  | 6     | 4     | 25                  | 3     | 2   |
